# Supplementary material for: Prospective Comparison Between Shotgun Metagenomics and Sanger Sequencing of the 16S rRNA Gene for the Etiological Diagnosis of Infections
Source: PubMed Central journal article supplement (PMC9020828; doi:10.3389/fmicb.2022.761873), 2022-04-06
Supplement: Table_1.pdf [file Table_1.pdf]

| Sample | Sample type                   | Suspected type of infection | Sanger 16S results | Identification by Sanger 16S      | SMg results | Identification by SMg (DNA library) | Number of DNA reads (relative abundance %*) | Bacterial load | Detection of RNA sequences of the bacteria detected by SMg (reads/relative abundance %) | Others bacterial species identified by SMg** (DNA reads/relative abundance %)                                                                                                                                                                                                                                                                          | Total reads (DNA) | Total human reads (DNA) | Total bacterial reads (DNA) | Total reads (RNA) | Total human reads (RNA) | Total bacterial reads (RNA) |
|--------|-------------------------------|-----------------------------|--------------------|-----------------------------------|-------------|-------------------------------------|---------------------------------------------|----------------|-----------------------------------------------------------------------------------------|--------------------------------------------------------------------------------------------------------------------------------------------------------------------------------------------------------------------------------------------------------------------------------------------------------------------------------------------------------|-------------------|-------------------------|-----------------------------|-------------------|-------------------------|-----------------------------|
| 1      | Abscess (psoas)               | Bone and joint              | Positive           | <i>Staphylococcus aureus</i>      | Positive    | <i>Staphylococcus aureus</i>        | 53 (88.3)                                   | Low            | Yes (30/1.5)                                                                            | <i>Klebsiella pneumoniae</i> (3/5.0)                                                                                                                                                                                                                                                                                                                   | 49,051,690        | 34,087,606              | 60                          | 26,863,460        | 14,038,123              | 2,068                       |
| 2      | Biopsy (tissue: carotid)      | Cardiovascular              | Positive           | α-haemolytic <i>Streptococcus</i> | Positive    | <i>Streptococcus pneumoniae</i>     | 47 (58.8)                                   | Low            | Yes (2/10)                                                                              | <i>Cutibacterium acnes</i> (14/17.5), <i>Ralstonia solanacearum</i> (8/10.0), <i>Staphylococcus aureus</i> (5/6.3)                                                                                                                                                                                                                                     | 43,878,464        | 29,729,838              | 80                          | 116,560           | 59,119                  | 20                          |
| 3      | Biopsy (tissue: mitral valve) | Cardiovascular              | Positive           | <i>Streptococcus gordonii</i>     | Positive    | <i>Streptococcus gordonii</i>       | 21,853 (99.2)                               | Intermediate   | Yes (57,626/34.8)                                                                       | X                                                                                                                                                                                                                                                                                                                                                      | 37,587,780        | 24,557,004              | 22,033                      | 49,574,336        | 32,562,501              | 165,797                     |
| 4      | Abscess (liver)               | Intra-abdominal             | Negative           | X                                 | Positive    | <i>Klebsiella pneumoniae</i>        | 147 (76.6)                                  | Low            | Yes (40/1.7)                                                                            | <i>Ralstonia solanacearum</i> (18/9.4), <i>Staphylococcus aureus</i> (9/4.7), <i>Cutibacterium acnes</i> (6/3.1), <i>Streptococcus salivarius</i> (4/2.1)                                                                                                                                                                                              | 24,804,076        | 11,906,531              | 192                         | 28,540,204        | 15,148,646              | 23,574                      |
| 5      | Biopsy (tissue: elbow)        | Bone and joint              | Uninterpretable    | X                                 | Positive    | <i>Mycobacterium tuberculosis</i>   | 10 (2.1)                                    | Low            | No                                                                                      | <i>Cutibacterium acnes</i> (373/79.5), <i>Rhodococcus rhodochrous</i> (12/2.6), <i>Escherichia coli</i> (6/1.3), <i>Pseudomonas putida</i> group (6/1.3), <i>Bifidobacterium longum</i> (6/1.3), <i>Propionibacterium</i> sp (5/1.1)                                                                                                                   | 86,974,428        | 45,885,017              | 469                         | 1,730             | 70                      | 0                           |
| 6      | Biopsy (tissue: thrombus)     | Cardiovascular              | Negative           | X                                 | Negative    | X                                   | X                                           | X              | X                                                                                       | <i>Cutibacterium acnes</i> (4/80.0)                                                                                                                                                                                                                                                                                                                    | 30,429,258        | 17,110,896              | 5                           | 13,993,974        | 9,113,432               | 2,925                       |
| 7      | Joint fluid (knee)            | Bone and joint              | Negative           | X                                 | Negative    | X                                   | X                                           | X              | X                                                                                       | <i>Staphylococcus aureus</i> (6/60.0)                                                                                                                                                                                                                                                                                                                  | 34,015,014        | 19,155,805              | 10                          | 15,271,164        | 7,672,062               | 29,906                      |
| 8      | Pleural fluid                 | Pulmonary                   | Negative           | X                                 | Negative    | X                                   | X                                           | X              | X                                                                                       | <i>Escherichia coli</i> (11/12.2), <i>Salmonella enterica</i> (10/11.1), <i>Pseudomonas aeruginosa</i> group (10/11.1), <i>Cutibacterium acnes</i> (8/8.9), <i>Staphylococcus aureus</i> (8/8.9), <i>Enterococcus faecalis</i> (6/6.7), <i>Pseudomonas aeruginosa</i> (6/6.7), <i>Bacillus subtilis</i> (4/4.4), <i>Listeria monocytogenes</i> (4/4.4) | 37,090,716        | 21,023,047              | 90                          | 22,300,834        | 12,362,379              | 20,877                      |
| 9      | Abscess                       | Bone and joint              | Positive           | <i>Cutibacterium acnes</i>        | Positive    | <i>Cutibacterium acnes</i>          | 9,498 (99.9)                                | Intermediate   | Yes (3,706/18.6)                                                                        | X                                                                                                                                                                                                                                                                                                                                                      | 37,213,620        | 26,479,436              | 9,504                       | 7,538,952         | 5,042,457               | 19,890                      |
| 10     | Joint fluid (knee)            | Bone and joint              | Positive           | <i>Neisseria meningitidis</i>     | Positive    | <i>Neisseria meningitidis</i>       | 2 (40.0)                                    | Low            | Yes (126/1.2)                                                                           | X                                                                                                                                                                                                                                                                                                                                                      | 11,896,258        | 7,596,960               | 5                           | 43,153,296        | 26,682,092              | 10,953                      |
| 11     | Biopsy (tissue: mitral valve) | Cardiovascular              | Negative           | X                                 | Negative    | X                                   | X                                           | X              | X                                                                                       | <i>Staphylococcus aureus</i> (6/15.4), <i>Cutibacterium acnes</i> (6/15.4), <i>Pseudomonas aeruginosa</i> group (4/10.3), <i>Acidovorax ebreus</i> (3/7.7)                                                                                                                                                                                             | 40,784,624        | 27,715,956              | 39                          | 26,346,200        | 16,147,978              | 30,402                      |

|    |                             |                        |          |                                          |          |                                                              |                |              |                    |                                                                                                                                                                                                                                                                                                                                                                                                                                                                                                                                                                                                                                                                                                                                                                                                                                                                                                                    |             |            |         |            |            |           |
|----|-----------------------------|------------------------|----------|------------------------------------------|----------|--------------------------------------------------------------|----------------|--------------|--------------------|--------------------------------------------------------------------------------------------------------------------------------------------------------------------------------------------------------------------------------------------------------------------------------------------------------------------------------------------------------------------------------------------------------------------------------------------------------------------------------------------------------------------------------------------------------------------------------------------------------------------------------------------------------------------------------------------------------------------------------------------------------------------------------------------------------------------------------------------------------------------------------------------------------------------|-------------|------------|---------|------------|------------|-----------|
| 12 | Biopsy (tissue)             | Bone and joint         | Positive | <i>Streptococcus</i> sp.                 | Negative | X                                                            | X              | X            | X                  | <i>Staphylococcus aureus</i> (4/33.3), <i>Streptococcus</i> sp (4/33.3)                                                                                                                                                                                                                                                                                                                                                                                                                                                                                                                                                                                                                                                                                                                                                                                                                                            | 21,526,680  | 13,955,159 | 12      | 134,554    | 30,813     | 18        |
| 13 | Cerebrospinal fluid         | Central nervous system | Negative | X                                        | Negative | X                                                            | X              | X            | X                  | <i>Cutibacterium acnes</i> (336/11.2), <i>Thermus scotoductus</i> (303/10.1), <i>Methylobacterium extorquens</i> (208/6.9), <i>Pseudomonas aeruginosa</i> (195/6.5), <i>Delftia tsuruhatensis</i> (165/5.5), <i>Pseudomonas aeruginosa</i> group (136/4.5), <i>Acidovorax</i> sp (105/3.5), <i>Rhodococcus hoagii</i> (96/3.2), <i>Comamonas aquatica</i> (88/2.9), <i>Meiothermus ruber</i> (54/2.1), <i>Cupriavidus basilensis</i> (51/1.7), <i>Acinetobacter junii</i> (49/1.6), <i>Methylobacterium extorquens</i> group (49/1.6), <i>Cupriavidus gilardii</i> (48/1.6), <i>Achromobacter xylooxidans</i> (46/1.5), <i>Acidovorax ebreus</i> (41/1.4), <i>Stenotrophomonas maltophilia</i> (36/1.2), <i>Comamonas testosteroni</i> (32/1.1), <i>Stenotrophomonas acidaminiphila</i> (31/1.0), <i>Sphingobium hydrophobicum</i> (31/1.0), <i>Methylobacterium zotmanii</i> (30/1.0), <i>Delftia</i> sp (30/1.0) | 16,264,858  | 10,104,534 | 2,994   | 37,012,206 | 13,069,328 | 1,582,075 |
| 14 | Biopsy (tissue: vegetation) | Cardiovascular         | Positive | $\beta$ -haemolytic <i>Streptococcus</i> | Positive | <i>Streptococcus dysgalactiae</i>                            | 26,147 (99.1)  | Intermediate | Yes (2/100)        | X                                                                                                                                                                                                                                                                                                                                                                                                                                                                                                                                                                                                                                                                                                                                                                                                                                                                                                                  | 25,909,552  | 16,726,733 | 26,375  | 26,624     | 11,687     | 2         |
| 15 | Abscess (sternal)           | Cardiovascular         | Negative | X                                        | Negative | X                                                            | X              | X            | X                  | <i>Cutibacterium acnes</i> (6/24.0), <i>Ralstonia solanacearum</i> (4/16.0), <i>Pseudomonas</i> sp (4/16.0)                                                                                                                                                                                                                                                                                                                                                                                                                                                                                                                                                                                                                                                                                                                                                                                                        | 34,214,594  | 22,950,433 | 4       | 24,368     | 9,150      | 0         |
| 16 | Joint fluid                 | Bone and joint         | Negative | X                                        | Negative | X                                                            | X              | X            | X                  | <i>Ralstonia solanacearum</i> (6/42.3), <i>Staphylococcus aureus</i> (3/21.4)                                                                                                                                                                                                                                                                                                                                                                                                                                                                                                                                                                                                                                                                                                                                                                                                                                      | 21,124,936  | 12,243,267 | 14      | 31,218,588 | 19,959,547 | 19,646    |
| 17 | Abscess (mediastinum)       | Cardiovascular         | Negative | X                                        | Positive | Cutaneous flora with <i>Cutibacterium acnes</i> predominance | 4,903 (83.2)   | Intermediate | Yes (1,141/0.05)   | <i>Micrococcus luteus</i> (131/2.2), <i>Staphylococcus aureus</i> (91/1.5), <i>Thermus scotoductus</i> (86/1.5), <i>Pseudomonas aeruginosa</i> (73/1.2)                                                                                                                                                                                                                                                                                                                                                                                                                                                                                                                                                                                                                                                                                                                                                            | 2,809,716   | 1,630,759  | 5,895   | 41,448,934 | 9,880,372  | 2,129,628 |
| 18 | Biopsy (tissue: vegetation) | Cardiovascular         | Positive | <i>Streptococcus</i> sp.                 | Positive | <i>Streptococcus mitis</i> group                             | 351,809 (99.5) | Intermediate | Yes (165,483/94.0) | X                                                                                                                                                                                                                                                                                                                                                                                                                                                                                                                                                                                                                                                                                                                                                                                                                                                                                                                  | 36,874,882  | 24,685,924 | 353,737 | 18,897,302 | 11,929,973 | 176,022   |
| 19 | Biopsy (bone)               | Bone and joint         | Negative | X                                        | Negative | X                                                            | X              | X            | X                  | <i>Ralstonia solanacearum</i> (4/22.2)                                                                                                                                                                                                                                                                                                                                                                                                                                                                                                                                                                                                                                                                                                                                                                                                                                                                             | 20,329,058  | 13,894,340 | 18      | 33,990,062 | 23,814,801 | 43,132    |
| 20 | Abscess (breast)            | Skin and soft tissue   | Negative | X                                        | Negative | X                                                            | X              | X            | X                  | <i>Ralstonia solanacearum</i> (38/46.3), <i>Staphylococcus aureus</i> (24/29.3), <i>Klebsiella aerogenes</i> (12/14.6)                                                                                                                                                                                                                                                                                                                                                                                                                                                                                                                                                                                                                                                                                                                                                                                             | 56,200,522  | 24,708,571 | 82      | 675,606    | 327,707    | 10        |
| 21 | Abscess (knee)              | Bone and joint         | Negative | X                                        | Negative | X                                                            | X              | X            | X                  | <i>Escherichia coli</i> (16/53.3), <i>Ralstonia solanacearum</i> (8/26.7), <i>Staphylococcus aureus</i> (4/13.3)                                                                                                                                                                                                                                                                                                                                                                                                                                                                                                                                                                                                                                                                                                                                                                                                   | 24,712,470  | 9,530,900  | 30      | 35,778     | 15,252     | 4         |
| 22 | Pleural fluid               | Pulmonary              | Negative | X                                        | Negative | X                                                            | X              | X            | X                  | <i>Ralstonia solanacearum</i> (48/41.4), <i>Staphylococcus aureus</i> (17/14.7), <i>Cutibacterium acnes</i> (12/10.3), <i>Acinetobacter johnsonii</i> (6/5.2), <i>Sphingobium hydrophobicum</i> (4/3.4)                                                                                                                                                                                                                                                                                                                                                                                                                                                                                                                                                                                                                                                                                                            | 159,677,808 | 79,102,493 | 116     | 43,707,740 | 21,364,169 | 4,238     |
| 23 | Biopsy (tissue: vegetation) | Cardiovascular         | Positive | <i>Staphylococcus</i> sp.                | Positive | <i>Staphylococcus aureus</i>                                 | 50 (90.9)      | Low          | Yes (2,218/12.2)   | X                                                                                                                                                                                                                                                                                                                                                                                                                                                                                                                                                                                                                                                                                                                                                                                                                                                                                                                  | 17,833,068  | 9,184,346  | 55      | 10,796,232 | 4,386,134  | 18,160    |
| 24 | Abscess (kidney)            | Genito-urinary         | Positive | <i>Enterococcus</i> sp.                  | Positive | <i>Enterococcus faecalis</i>                                 | 20 (11.6)      | Low          | Yes (12/0.9)       | <i>Ralstonia solanacearum</i> (67/38.7), <i>Staphylococcus aureus</i> (44/25.4), <i>Uncultured bacterium</i> (6/3.5), <i>Cutibacterium acnes</i> (6/3.5), <i>Acidovorax</i> sp (6/3.5), <i>Enterococcus faecium</i> (6/3.5), <i>Corynebacterium imitans</i> (4/2.3)                                                                                                                                                                                                                                                                                                                                                                                                                                                                                                                                                                                                                                                | 30,262,382  | 14,285,886 | 173     | 41,771,806 | 19,916,858 | 1,302     |

|    |                                  |                |                 |                                   |          |                                   |               |              |              |                                                                                                                                                                                                                                                                                                                                                                                                                                                                                                                                                                                                                                                                    |             |            |        |            |            |        |
|----|----------------------------------|----------------|-----------------|-----------------------------------|----------|-----------------------------------|---------------|--------------|--------------|--------------------------------------------------------------------------------------------------------------------------------------------------------------------------------------------------------------------------------------------------------------------------------------------------------------------------------------------------------------------------------------------------------------------------------------------------------------------------------------------------------------------------------------------------------------------------------------------------------------------------------------------------------------------|-------------|------------|--------|------------|------------|--------|
| 25 | Joint fluid                      | Bone and joint | Positive        | <i>Streptococcus dysgalactiae</i> | Positive | <i>Streptococcus dysgalactiae</i> | 36 (43.4)     | Low          | No           | <i>Ralstonia solanacearum</i> (20/24.1), <i>Staphylococcus aureus</i> (12/14.5), <i>Brevundimonas diminuta</i> 52/2.4), <i>Cupriavidus gilardii</i> (2/2.4), <i>Streptococcus suis</i> (2/2.4), <i>Comamonas aquatica</i> (2/2.4), <i>Actinomyces oris</i> (2/2.4), <i>Streptococcus pyogenes</i> (2/2.4), <i>Cutibacterium acnes</i> (2/2.4)                                                                                                                                                                                                                                                                                                                      | 27,143,300  | 17,934,537 | 83     | 117,730    | 67,820     | 0      |
| 26 | Joint fluid                      | Bone and joint | Negative        | X                                 | Negative | X                                 | X             | X            | X            | <i>Ralstonia solanacearum</i> (12/57.1), <i>Staphylococcus aureus</i> (7/33.3)                                                                                                                                                                                                                                                                                                                                                                                                                                                                                                                                                                                     | 45,219,778  | 30,865,846 | 21     | 173,112    | 55,621     | 2      |
| 27 | Pleural fluid                    | Pulmonary      | Negative        | X                                 | Negative | X                                 | X             | X            | X            | <i>Escherichia coli</i> (40/57.1), <i>Ralstonia solanacearum</i> (9/12.9), <i>Pseudomonas aeruginosa</i> group (4/5.7), <i>Thermus scotoductus</i> (3/4.3)                                                                                                                                                                                                                                                                                                                                                                                                                                                                                                         | 31,354,508  | 15,156,842 | 70     | 19,069,190 | 9,106,808  | 13,783 |
| 28 | Joint fluid                      | Bone and joint | Negative        | X                                 | Positive | <i>Klebsiella pneumoniae</i>      | 471 (69.7)    | Intermediate | No           | <i>Stenotrophomonas maltophilia</i> (85/12.5), <i>Escherichia coli</i> (52/7.7), <i>Stenotrophomonas</i> sp (12/1.8), <i>Salmonella enterica</i> (10/1.5), <i>Klebsiella varicicola</i> (7/1.0)                                                                                                                                                                                                                                                                                                                                                                                                                                                                    | 28,009,902  | 14,180,503 | 676    | 35,458,066 | 17,404,340 | 12,443 |
| 29 | Biopsy (tissue: aortic aneurysm) | Cardiovascular | Positive        | <i>Bacteroides fragilis</i>       | Positive | <i>Bacteroides fragilis</i>       | 12,525 (99.4) | Intermediate | Yes (6/75.0) | X                                                                                                                                                                                                                                                                                                                                                                                                                                                                                                                                                                                                                                                                  | 48,945,934  | 32,080,036 | 12,604 | 41,732     | 24,071     | 8      |
| 30 | Pleural fluid                    | Pulmonary      | Negative        | X                                 | Negative | X                                 | X             | X            | X            | <i>Cutibacterium acnes</i> (8/40.0)                                                                                                                                                                                                                                                                                                                                                                                                                                                                                                                                                                                                                                | 18,186,802  | 8,987,604  | 20     | 13,800,400 | 6,940,325  | 13,545 |
| 31 | Abscess                          | Cardiovascular | Uninterpretable | X                                 | Negative | X                                 | X             | X            | X            | <i>Cutibacterium acnes</i> (10/34.5), <i>Pseudomonas</i> sp (4/13.8), <i>Ralstonia solanacearum</i> (3/10.3)                                                                                                                                                                                                                                                                                                                                                                                                                                                                                                                                                       | 21,444,018  | 11,630,831 | 29     | 398,376    | 156,628    | 8      |
| 32 | Biopsy (tissue: aortic valve)    | Cardiovascular | Negative        | X                                 | Negative | X                                 | X             | X            | X            | <i>Ralstonia solanacearum</i> (138/34.5), <i>Staphylococcus aureus</i> (69/17.3), <i>Cutibacterium acnes</i> (42/10.5), <i>Escherichia coli</i> (13/3.3), <i>Cutibacterium granulosum</i> (10/2.5), <i>Acidovorax</i> sp (8/2.0), <i>Campylobacter ureolyticus</i> (8/2.0), <i>Klebsiella pneumoniae</i> (7/1.8), <i>Uncultured bacterium</i> (6/1.5), <i>Staphylococcus epidermidis</i> (6/1.5), <i>Alcaligenes faecalis</i> (5/1.3), <i>Pseudomonas fluorescens</i> (5/1.3), <i>Pseudomonas</i> sp (4/1.0), <i>Moraxella osloensis</i> (4/1.0), <i>Rathia dentocariosa</i> (4/1.0), <i>Diaphorobacter</i> sp (4/1.0), <i>Streptococcus parasanguinis</i> (4/1.0) | 159,086,958 | 90,146,025 | 400    | 32,78      | 15,383     | 2      |
| 33 | Biopsy (tissue: aortic valve)    | Cardiovascular | Negative        | X                                 | Negative | X                                 | X             | X            | X            | <i>Cutibacterium granulosum</i> (8/22.2), <i>Cutibacterium acnes</i> (5/13.9), <i>Pseudomonas aeruginosa</i> group (4/11.1)                                                                                                                                                                                                                                                                                                                                                                                                                                                                                                                                        | 28,058,184  | 13,942,161 | 36     | 8,591,480  | 2,772,464  | 8,584  |
| 34 | Biopsy (bone)                    | Bone and joint | Negative        | X                                 | Negative | X                                 | X             | X            | X            | <i>Ochrobactrum anthropi</i> (12/14.3), <i>Thermus scotoductus</i> (11/13.1), <i>Delftia tsuruhatensis</i> (10/11.9), <i>Cutibacterium acnes</i> (10/11.9), <i>Pseudomonas aeruginosa</i> (8/9.5), <i>Pseudomonas aeruginosa</i> group (6/7.1)                                                                                                                                                                                                                                                                                                                                                                                                                     | 17,188,902  | 8,375,224  | 84     | 19,426,688 | 7,669,343  | 47,127 |
| 35 | Biopsy (bone)                    | Bone and joint | Negative        | X                                 | Negative | X                                 | X             | X            | X            | <i>Cutibacterium acnes</i> (30/46.2), <i>Escherichia coli</i> (10/15.4), <i>Anoxybacillus flavithermus</i> (4/6.2), <i>Lactobacillus crispatus</i> (4/6.2)                                                                                                                                                                                                                                                                                                                                                                                                                                                                                                         | 21,030,260  | 11,819,215 | 65     | 4,098,466  | 2,326,183  | 637    |

|    |                           |                      |          |                               |          |                                           |            |     |               |                                                                                                                                                                                                                                                                                                                                                                                                                                                                                                                                                                                                                                        |            |            |       |            |            |         |
|----|---------------------------|----------------------|----------|-------------------------------|----------|-------------------------------------------|------------|-----|---------------|----------------------------------------------------------------------------------------------------------------------------------------------------------------------------------------------------------------------------------------------------------------------------------------------------------------------------------------------------------------------------------------------------------------------------------------------------------------------------------------------------------------------------------------------------------------------------------------------------------------------------------------|------------|------------|-------|------------|------------|---------|
| 36 | Biopsy (tissue: thigh)    | Cardiovascular       | Negative | X                             | Negative | X                                         | X          | X   | X             | <i>Moraxella osloensis</i> (12/34.3), <i>Cutibacterium acnes</i> (6/17.1), <i>Escherichia coli</i> (4/11.4), <i>Ralstonia solanacearum</i> (3/8.6)                                                                                                                                                                                                                                                                                                                                                                                                                                                                                     | 22,452,202 | 12,827,965 | 35    | 1,970      | 935        | 2       |
| 37 | Biopsy (tissue: mastoid)  | Bone and joint       | Negative | X                             | Negative | X                                         | X          | X   | X             | <i>Cutibacterium acnes</i> (79/65.3), <i>Staphylococcus hominis</i> (10/8.3), <i>Moraxella osloensis</i> (6/5.0), <i>Lactobacillus crispatus</i> (4/3.3), <i>Kocuria palustris</i> (4/3.3), <i>Comamonas aquatica</i> (2/1.7), <i>Cutibacterium granulosum</i> (2/1.7), <i>Acidovorax ebreus</i> (2/1.7), <i>Paracoccus yeei</i> (2/1.7), <i>Finogoldia magna</i> (2/1.7), <i>Brochothrix thermosphacta</i> (2/1.7), <i>Streptococcus suis</i> (2/1.7), <i>Rothia dentocariosa</i> (2/1.7)                                                                                                                                             | 30,784,946 | 20,409,434 | 121   | 32,621,686 | 20,456,556 | 17,535  |
| 38 | Biopsy (tissue)           | Cardiovascular       | Negative | X                             | Negative | X                                         | X          | X   | X             | <i>Cutibacterium acnes</i> (304/60.7), <i>Staphylococcus hominis</i> (42/7.0), <i>Escherichia coli</i> (29/4.8), <i>Moraxella osloensis</i> (25/4.2), <i>Ralstonia solanacearum</i> (14/2.3), <i>Cutibacterium granulosum</i> (13/2.2), <i>Staphylococcus epidermidis</i> (11/1.8), <i>Streptococcus suis</i> (7/1.2), <i>Serratia marcescens</i> (6/1.0), <i>Acidovorax</i> sp (6/1.0), <i>Methylobacterium extorquens</i> (6/1.0), <i>Staphylococcus lugdunensis</i> (6/1.0), <i>Staphylococcus aureus</i> (6/1.0), <i>Lactobacillus amylophilus</i> (6/1.0), <i>Micrococcus luteus</i> (6/1.0), <i>Meiothermus silvanus</i> (6/1.0) | 73,133,874 | 48,786,806 | 600   | 15,800,512 | 9,932,688  | 16,170  |
| 39 | Granuloma                 | Skin and soft tissue | Negative | X                             | Positive | <i>Mycobacterium tuberculosis</i> complex | 10 (15.6)  | Low | No            | <i>Ralstonia solanacearum</i> (14/21.9), <i>Cutibacterium acnes</i> (6/9.4), <i>Staphylococcus aureus</i> (6/9.4), <i>Escherichia coli</i> (6/9.4), <i>Klebsiella pneumoniae</i> (5/7.8), <i>Acidovorax</i> sp (4/6.3), <i>Capnocytophaga sputigena</i> (4/6.3)                                                                                                                                                                                                                                                                                                                                                                        | 25,105,672 | 14,557,253 | 64    | 63,048     | 32,569     | 0       |
| 40 | Biopsy (tissue: inguinal) | Genito-urinary       | Negative | X                             | Negative | X                                         | X          | X   | X             | <i>Escherichia coli</i> (8/11.9), <i>Thermus scotoductus</i> (7/10.4), <i>Delftia tsuruhatensis</i> (7/10.4), <i>Cutibacterium acnes</i> (6/9.0), <i>Cupriavidus gilardii</i> (5/7.5), <i>Shigella boydii</i> (4/6.0), <i>Rhodococcus hoagii</i> (4/6.0)                                                                                                                                                                                                                                                                                                                                                                               | 24,823,602 | 15,868,071 | 67    | 38,297,470 | 26,231,331 | 146,824 |
| 41 | Joint fluid (knee)        | Bone and joint       | Positive | <i>Mycoplasma hominis</i>     | Positive | <i>Mycoplasma hominis</i>                 | 24 (70.6)  | Low | Yes (161/1.5) | <i>Cutibacterium acnes</i> (6/17.6)                                                                                                                                                                                                                                                                                                                                                                                                                                                                                                                                                                                                    | 34,662,278 | 16,522,451 | 34    | 45,128,954 | 17,356,452 | 10,823  |
| 42 | Biopsy (tissue)           | Cardiovascular       | Positive | <i>Streptococcus pyogenes</i> | Positive | <i>Streptococcus pyogenes</i>             | 102 (94.4) | Low | Yes (326/4.0) | X                                                                                                                                                                                                                                                                                                                                                                                                                                                                                                                                                                                                                                      | 27,745,268 | 13,019,717 | 108   | 36,336,862 | 12,847,888 | 8,187   |
| 43 | Biopsy (tissue)           | Bone and joint       | Negative | X                             | Negative | X                                         | X          | X   | X             | <i>Kocuria palustris</i> (569/18.6), <i>Deinococcus proteolyticus</i> (442/14.4), <i>Arsenicococcus</i> sp (244/8.0), <i>Delftia tsuruhatensis</i> (206/6.7), <i>Cupriavidus gilardii</i> (177/5.8), <i>Cutibacterium acnes</i> (160/5.2), <i>Micrococcus luteus</i> (121/3.9), <i>Kytococcus sedentarius</i> (93/3.0), <i>Achromobacter xylosoxidans</i> (82/2.8), <i>Janibacter indicus</i> (72/2.3), <i>Acidovorax</i> sp (49/1.6)                                                                                                                                                                                                  | 435,424    | 165,868    | 3,066 | 24,382,782 | 2,642,123  | 424,889 |

|    |                                   |                |          |                                    |          |                                |                |              |                    |                                                                                                                                                                                                                                                                                                                                                                                                                                                                                                             |            |            |         |            |            |         |
|----|-----------------------------------|----------------|----------|------------------------------------|----------|--------------------------------|----------------|--------------|--------------------|-------------------------------------------------------------------------------------------------------------------------------------------------------------------------------------------------------------------------------------------------------------------------------------------------------------------------------------------------------------------------------------------------------------------------------------------------------------------------------------------------------------|------------|------------|---------|------------|------------|---------|
| 44 | Biopsy (bone)                     | Bone and joint | Negative | X                                  | Negative | X                              | X              | X            | X                  | <i>Cutibacterium acnes</i> (66/54.1), <i>Staphylococcus hominis</i> (14/11.5), <i>Corynebacterium singulare</i> (9/7.4), <i>Ralstonia solanacearum</i> (6/4.9), <i>Moraxella osloensis</i> (6/4.9)                                                                                                                                                                                                                                                                                                          | 24,264,080 | 15,685,939 | 122     | 21,716,116 | 13,727,327 | 17,661  |
| 45 | Biopsy (tissue: sternum)          | Bone and joint | Negative | X                                  | Positive | <i>Corynebacterium</i> sp.     | 200 (53.5)     | Low          | Yes (845/3.4)      | <i>Cutibacterium acnes</i> (104/27.8), <i>Staphylococcus hominis</i> (14/3.7), <i>Escherichia coli</i> (9/2.4), <i>Lactobacillus crispatus</i> (6/1.6), <i>Staphylococcus epidermidis</i> (5/1.3), <i>Lactobacillus johnsonii</i> (4/1.1), <i>Moraxella osloensis</i> (4/1.1)                                                                                                                                                                                                                               | 40,880,544 | 27,563,026 | 374     | 13,278,044 | 8,588,517  | 24,517  |
| 46 | Biopsy (tissue: vegetation)       | Cardiovascular | Positive | <i>Enterococcus</i> sp.            | Positive | <i>Enterococcus faecalis</i>   | 509 (82.8)     | Low          | Yes (524/4.7)      | <i>Cutibacterium acnes</i> (56/9.1), <i>Lactobacillus crispatus</i> (6/1.0)                                                                                                                                                                                                                                                                                                                                                                                                                                 | 30,376,828 | 19,691,476 | 615     | 11,694,134 | 6,958,777  | 11,085  |
| 47 | Biopsy (bone: pubic symphysis)    | Bone and joint | Negative | X                                  | Negative | X                              | X              | X            | X                  | <i>Cutibacterium acnes</i> (274/31.7), <i>Staphylococcus hominis</i> (119/13.8), <i>Moraxella osloensis</i> (52/6.0), <i>Escherichia coli</i> (48/5.5), <i>Microbacterium aurum</i> (46/5.3), <i>Bacillus flexus</i> (46/5.3), <i>Pseudomonas aeruginosa</i> group (18/2.1), <i>Rhizobium</i> sp (18/2.1), <i>Ralstonia solanacearum</i> (16/1.8), <i>Kocuria palustris</i> (16/1.8), <i>Staphylococcus epidermidis</i> (14/1.6), <i>Acinetobacter</i> sp (13/1.5), <i>Lactobacillus crispatus</i> (10/1.2) | 8,925,940  | 5,549,087  | 865     | 28,466,736 | 19,819,575 | 56,330  |
| 48 | Biopsy (tissue:foot)              | Bone and joint | Positive | <i>Staphylococcus aureus</i>       | Positive | <i>Staphylococcus aureus</i>   | 33 (18.4)      | Low          | Yes (1,239/8.4)    | <i>Cutibacterium acnes</i> (90/50.3), <i>Moraxella osloensis</i> (33/18.4), <i>Staphylococcus hominis</i> (8/4.5), <i>Ralstonia solanacearum</i> (6/3.4), <i>Propionibacterium</i> sp (4/2.2), <i>Escherichia coli</i> (4/2.2), <i>Cutibacterium granulatum</i> (3/1.7)                                                                                                                                                                                                                                     | 34,560,878 | 22,847,071 | 179     | 25,677,418 | 17,132,707 | 14,801  |
| 49 | Joint fluid                       | Bone and joint | Positive | <i>Staphylococcus aureus</i>       | Positive | <i>Staphylococcus aureus</i>   | 36 (56.3)      | Low          | Yes (299/3.6)      | <i>Cutibacterium acnes</i> (18/28.1)                                                                                                                                                                                                                                                                                                                                                                                                                                                                        | 30,830,034 | 20,161,727 | 64      | 25,634,338 | 15,724,781 | 8,266   |
| 50 | Biopsy (tissue: spine)            | Bone and joint | Positive | <i>Staphylococcus aureus</i>       | Positive | <i>Staphylococcus aureus</i>   | 170,822 (99.9) | Intermediate | Yes (154,940/96.5) | X                                                                                                                                                                                                                                                                                                                                                                                                                                                                                                           | 34,869,438 | 23,106,922 | 170,850 | 1,588,880  | 722,767    | 160,520 |
| 51 | Biopsy (tissue: valve prosthesis) | Cardiovascular | Positive | <i>Streptococcus milleri</i> group | Positive | <i>Streptococcus anginosus</i> | 156 (75.7)     | Low          | Yes (96/0.8)       | <i>Staphylococcus aureus</i> (14/6.8), <i>Ralstonia solanacearum</i> (14/6.8), <i>Klebsiella pneumoniae</i> (4/1.9), <i>Pseudomonas</i> sp (4/1.9), <i>Uncultured bacterium</i> (3/1.5), <i>Melaninivora</i> sp (3/1.5)                                                                                                                                                                                                                                                                                     | 45,492,668 | 26,894,710 | 206     | 37,054,226 | 21,186,858 | 12,272  |
| 52 | Biopsy (tissue: aortic valve)     | Cardiovascular | Positive | <i>Streptococcus mitis</i> group   | Positive | <i>Streptococcus sanguinis</i> | 379 (66.5)     | Intermediate | Yes (95/0.05)      | <i>Cutibacterium acnes</i> (38/6.7), <i>Pseudomonas putida</i> (14/2.5), <i>Escherichia coli</i> (12/2.1), <i>Pseudomonas psychrotolerans</i> (11/2.0), <i>Acidovorax</i> sp (11/2.0), <i>Ralstonia solanacearum</i> (10/1.75), <i>Pseudomonas aeruginosa</i> group (1.2), <i>Thermus scotoductus</i> (6/1.1)                                                                                                                                                                                               | 11,495,818 | 5,266,919  | 570     | 30,777,850 | 15,532,463 | 175,487 |
| 53 | Biopsy (bone)                     | Bone and joint | Negative | X                                  | Negative | X                              | X              | X            | X                  | <i>Ralstonia solanacearum</i> (4/30.8), <i>Staphylococcus aureus</i> (3/23.1)                                                                                                                                                                                                                                                                                                                                                                                                                               | 24,627,924 | 14,908,581 | 13      | 26,745,638 | 16,570,264 | 29,479  |
| 54 | Biopsy (tissue: ankle)            | Bone and joint | Negative | X                                  | Negative | X                              | X              | X            | X                  | <i>Kocuria rhizophila</i> (7/16.7), <i>Acinetobacter schindleri</i> (9.5), <i>Diaphorobacter</i> sp (4/9.5)                                                                                                                                                                                                                                                                                                                                                                                                 | 29,811,842 | 19,139,186 | 42      | 24,801,086 | 12,403,511 | 161,803 |
| 55 | Joint fluid                       | Bone and joint | Negative | X                                  | Negative | X                              | X              | X            | X                  | <i>Cutibacterium acnes</i> (4/40.0)                                                                                                                                                                                                                                                                                                                                                                                                                                                                         | 18,785,234 | 11,477,857 | 10      | 13,894,018 | 8,320,238  | 78,252  |

|    |                               |                 |                 |                                                 |          |                                   |                  |              |                      |                                                                                                                                                                                                                                                                                                                                                                                                                                                                                                                                                                                                                                                                                  |            |            |           |            |            |           |
|----|-------------------------------|-----------------|-----------------|-------------------------------------------------|----------|-----------------------------------|------------------|--------------|----------------------|----------------------------------------------------------------------------------------------------------------------------------------------------------------------------------------------------------------------------------------------------------------------------------------------------------------------------------------------------------------------------------------------------------------------------------------------------------------------------------------------------------------------------------------------------------------------------------------------------------------------------------------------------------------------------------|------------|------------|-----------|------------|------------|-----------|
| 56 | Joint fluid                   | Bone and joint  | Negative        | X                                               | Negative | X                                 | X                | X            | X                    | <i>Ralstonia solanacearum</i> (4/28.6)                                                                                                                                                                                                                                                                                                                                                                                                                                                                                                                                                                                                                                           | 30,321,000 | 18,910,315 | 14        | 16,642,658 | 6,108,776  | 22,239    |
| 57 | Abscess (kidney)              | Genito-urinary  | Negative        | X                                               | Negative | X                                 | X                | X            | X                    | <i>Acinetobacter junii</i> (16/8.9), <i>Pseudomonas aeruginosa</i> group (14/7.8), <i>Cutibacterium acnes</i> (12/6.7), <i>Ralstonia solanacearum</i> (11/6.1), <i>Achromobacter xylosoxidans</i> (10/5.6), <i>Escherichia coli</i> (8/4.4), <i>Rhodocyclaceae bacterium</i> (7/3.9), <i>Propionibacterium</i> sp (6/3.3), <i>Acetanaerobium sticklandii</i> (6/3.3), <i>Haemophilus parainfluenzae</i> (5/2.8), <i>Alicyclophilus denitrificans</i> (5/2.8), <i>Acidovorax ebreus</i> (5/2.8), <i>Melaminivora</i> sp (4/2.2), <i>Bifidobacterium breve</i> (4/2.2), <i>Burkholderia cepacia</i> complex (3/1.7), <i>Acidovorax</i> sp (3/1.7), <i>Actinomyces oris</i> (3/1.7) | 2,778,964  | 1,164,699  | 180       | 28,881,414 | 16,929,514 | 116,375   |
| 58 | Biopsy (tissue: vegetation)   | Cardiovascular  | Positive        | <i>Bartonella</i> sp.                           | Positive | <i>Bartonella quintana</i>        | 5,233,510 (99.9) | High         | Yes (5,147,047/99.5) | X                                                                                                                                                                                                                                                                                                                                                                                                                                                                                                                                                                                                                                                                                | 12,036,808 | 2,066,350  | 5,233,529 | 30,139,064 | 3,002,421  | 5,175,257 |
| 59 | Joint fluid                   | Bone and joint  | Uninterpretable | X                                               | Negative | X                                 | X                | X            | X                    | <i>Ralstonia solanacearum</i> (6/19.4), <i>Citrobacter freundii</i> complex (4/12.9), <i>Arthrobacter</i> sp (3/9.7)                                                                                                                                                                                                                                                                                                                                                                                                                                                                                                                                                             | 23,799,842 | 14,318,827 | 31        | 23,268,806 | 9,689,153  | 11,390    |
| 60 | Biopsy (tissue: hip)          | Bone and joint  | Positive        | <i>Escherichia coli</i>                         | Positive | <i>Escherichia coli</i>           | 337 (68.1)       | Intermediate | Yes (160/6.1)        | <i>Moraxella osloensis</i> (36/7.3), <i>Microbacterium aurum</i> (26/5.3), <i>Ralstonia solanacearum</i> (12/2.4), <i>Corynebacterium vitae</i> (10/2.0)                                                                                                                                                                                                                                                                                                                                                                                                                                                                                                                         | 26,117,318 | 18,074,619 | 495       | 31,835,322 | 19,914,043 | 2,615     |
| 61 | Abscess (intra-abdominal)     | Intra-abdominal | Positive        | <i>Staphylococcus</i> sp.                       | Positive | <i>Staphylococcus lugdunensis</i> | 1,273 (79.7)     | Intermediate | No                   | <i>Cutibacterium acnes</i> (82/5.1), <i>Escherichia coli</i> (26/1.6), <i>Pseudomonas</i> sp (25/1.6), <i>Ralstonia solanacearum</i> (17/1.1)                                                                                                                                                                                                                                                                                                                                                                                                                                                                                                                                    | 38,797,462 | 21,876,147 | 1,597     | 1,002,840  | 463,382    | 12        |
| 62 | Biopsy (tissue: hip)          | Bone and joint  | Negative        | X                                               | Positive | <i>Cutibacterium acnes</i>        | 763 (99.6)       | Intermediate | Yes (286/1.2)        | X                                                                                                                                                                                                                                                                                                                                                                                                                                                                                                                                                                                                                                                                                | 20,851,744 | 15,058,863 | 766       | 15,451,286 | 10,571,474 | 24,584    |
| 63 | Abscess (liver)               | Intra-abdominal | Positive        | <i>Fusobacterium nucleatum</i>                  | Positive | <i>Fusobacterium nucleatum</i>    | 2,594 (99.5)     | Intermediate | Yes (12,400/96.0)    | X                                                                                                                                                                                                                                                                                                                                                                                                                                                                                                                                                                                                                                                                                | 17,463,924 | 11,095,065 | 2,606     | 1,860,896  | 1,166,727  | 12,916    |
| 64 | Biopsy (tissue: aortic valve) | Cardiovascular  | Negative        | X                                               | Positive | <i>Staphylococcus epidermidis</i> | 169 (44.4)       | Low          | Yes (1,698/28.7)     | <i>Ralstonia solanacearum</i> (48/12.6), <i>Staphylococcus aureus</i> (29/7.6), <i>Cutibacterium acnes</i> (18/4.7), <i>Haemophilus parainfluenzae</i> (10/2.6), <i>Streptococcus</i> sp (8/2.1), <i>Streptococcus pneumoniae</i> (6/1.6), <i>Uncultured bacterium</i> (6/1.6)                                                                                                                                                                                                                                                                                                                                                                                                   | 74,903,930 | 49,731,363 | 381       | 32,084,336 | 13,359,404 | 59,252    |
| 65 | Joint fluid (knee)            | Bone and joint  | Positive        | <i>Streptococcus</i> sp. + <i>Moraxella</i> sp. | Negative | X                                 | X                | X            | X                    | <i>Ralstonia solanacearum</i> (10/35.7), <i>Uncultured bacterium</i> (8/28.6), <i>Staphylococcus aureus</i> (5/17.9)                                                                                                                                                                                                                                                                                                                                                                                                                                                                                                                                                             | 29,159,912 | 17,777,989 | 28        | 4,362,910  | 2,774,201  | 641       |
| 66 | Abscess (knee)                | Bone and joint  | Positive        | <i>Pseudomonas fluorescens</i> group            | Negative | X                                 | X                | X            | X                    | X                                                                                                                                                                                                                                                                                                                                                                                                                                                                                                                                                                                                                                                                                | 20,127,602 | 13,088,565 | 7         | 12,816     | 7,016      | 2         |
| 67 | Biopsy (tissue: knee)         | Bone and joint  | Negative        | X                                               | Negative | X                                 | X                | X            | X                    | <i>Ralstonia solanacearum</i> (52/43.0), <i>Staphylococcus aureus</i> (32/26.4), <i>Cutibacterium acnes</i> (9/7.4), <i>Escherichia coli</i> (6/5.0), <i>Microbacterium aurum</i> (4/3.3)                                                                                                                                                                                                                                                                                                                                                                                                                                                                                        | 51,333,442 | 30,645,045 | 121       | 33,900,372 | 19,624,723 | 7,649     |

SMg: Shotgun metagenomics; Sanger 16S: Amplification of the 16S rRNA gene and Sanger sequencing of the PCR products
